# Supplementary material
Source: PubMed Central journal article supplement (PMC3201571)
Supplement: neo1310_0947SD1.pdf [file neo1310_0947SD1.pdf]

**Table W1.** Source of Antibodies.

| Antibody                                              | Catalog No.                                   |
|-------------------------------------------------------|-----------------------------------------------|
| Depletion                                             |                                               |
| Anti-LFA-1 ( $\alpha$ L $\beta$ 2)                    | 553118 (BD Pharmingen)                        |
| Anti-CD49d ( $\alpha$ 4)                              | 553154 (BD Pharmingen)                        |
| Rat IgG2a                                             | 553927 (BD Pharmingen)                        |
| Rat IgG2b                                             | 553986 (BD Pharmingen)                        |
| Flow cytometry                                        |                                               |
| Anti-CD45                                             | 560501 (BD Pharmingen)                        |
| Anti-CD19                                             | 561113 (BD Pharmingen)                        |
| Anti-CD138                                            | 553714 (BD Pharmingen)                        |
| Anti-CD40                                             | 558695 (BD Pharmingen)                        |
| Anti-CD86                                             | 553768 (BD Pharmingen)                        |
| Anti-CD21                                             | 552957 (BD Pharmingen)                        |
| Anti-B220                                             | 553138 (BD Pharmingen)                        |
| Anti-CD3                                              | 553063 (BD Pharmingen)                        |
| Anti-CD8 alpha                                        | 553035 (BD Pharmingen)                        |
| Anti-CD4                                              | 553052 (BD Pharmingen)                        |
| Anti-CD14                                             | 553063 (BD Pharmingen)                        |
| Immunocytochemistry                                   |                                               |
| Anti-CD19                                             | MCA1439GA (Serotec, Oxford, United Kingdom)   |
| Anti-vimentin                                         | NB100-92123 (Novus Biological, Littleton, CO) |
| Alexa <sub>594</sub> -conjugated goat anti-rat IgG    | A-11007 (Invitrogen)                          |
| Alexa <sub>488</sub> -conjugated goat anti-rabbit IgG | A-11034 (Invitrogen)                          |

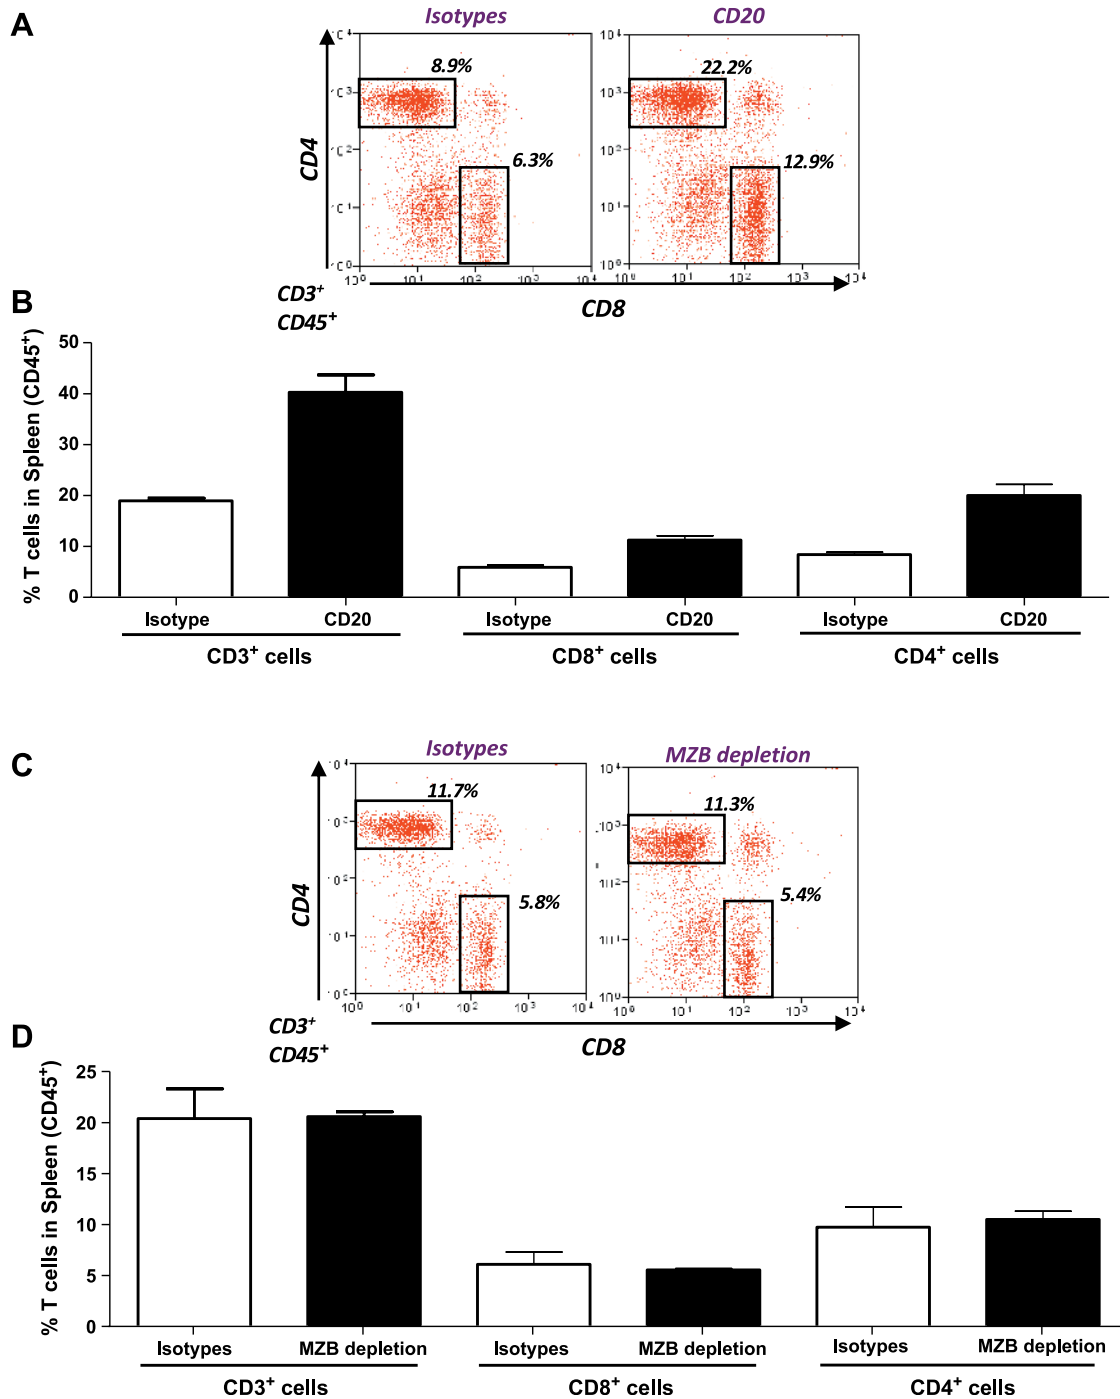

**Figure W1.** Administration of antimouse CD20 antibodies or MZB depleting antibodies does not deplete T cells. (A) Representative dot plots show the populations of T lymphocytes in the spleen of naive mice injected i.p. with mouse antimouse CD20 antibody (IgG2a, 300  $\mu$ g) or with isotype control (mouse anti-human CD20 IgG2a, 300  $\mu$ g). (B) Spleens were collected 7 days after depletion and total CD3<sup>+</sup> lymphocytes, CD4<sup>+</sup> T cells, and CD8<sup>+</sup> T cells (CD45<sup>+</sup>/CD3<sup>+</sup> and CD4<sup>+</sup> or CD8<sup>+</sup>, respectively) were quantified by flow cytometry. (C) Representative dot plots show the populations of T lymphocytes in the spleen of naive mice injected i.p. with anti-CD49d antibody (100  $\mu$ g) and anti-LFA-1 antibody (100  $\mu$ g) or the corresponding isotype controls (rat IgG2a and rat IgG2b, 100  $\mu$ g each). (D) Spleens were collected 7 days after depletion, and total CD3<sup>+</sup> lymphocytes and CD4 and CD8 T cells (CD45<sup>+</sup>/CD3<sup>+</sup> and CD4<sup>+</sup> or CD8<sup>+</sup>), respectively, were quantified by flow cytometry.

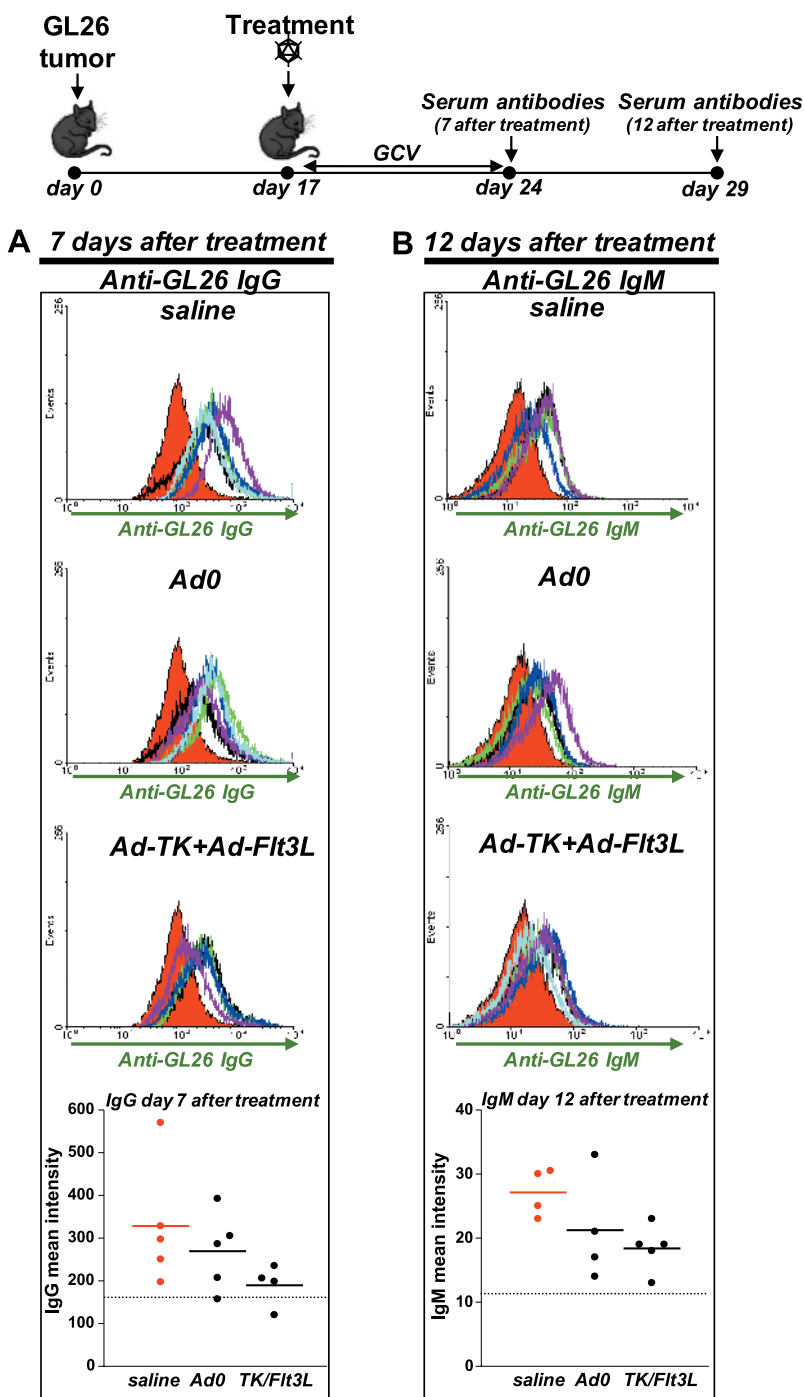

**Figure W2.** Assessment of the antibody response against the tumor. GL26 cells were implanted in the striatum of C57BL/6 mice and treated 14 days later with an intratumoral injection of Ad-TK+Ad-Flt3L, saline, or an empty vector (Ad.0). At 7 (A) and 12 (B) days after the treatment, serum was collected to evaluate the presence of circulating anti-GL26 cell IgG (A) and IgM (B), respectively. Histograms and graphs show the fluorescence intensity of fixed GL26 cells that were incubated with normal C57BL/6 serum (red area) or serum from treated tumor-bearing mice (colored lines), followed by FITC-conjugated antimouse IgM or IgG.

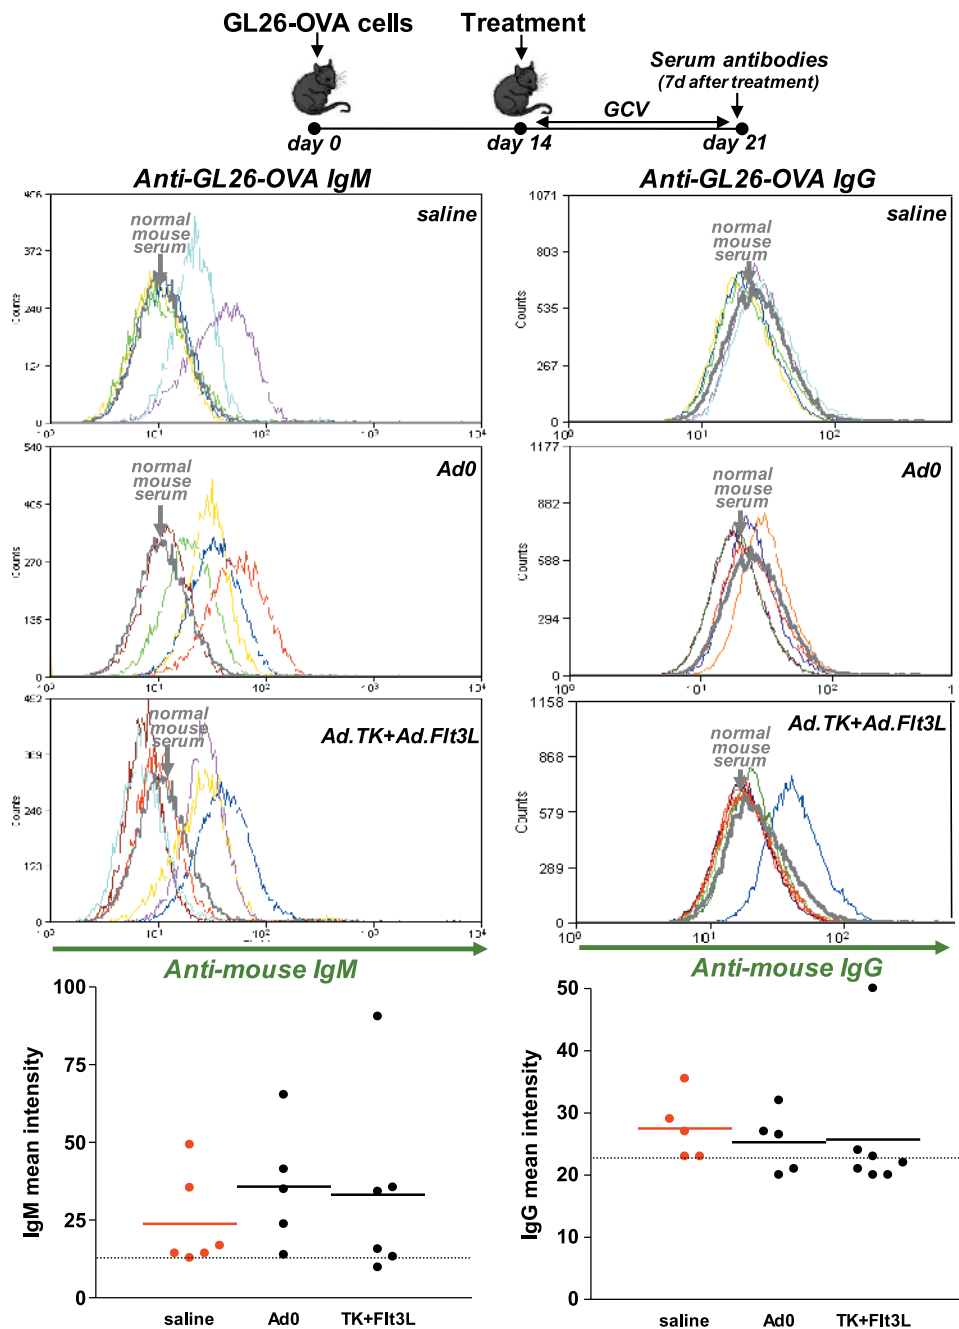

**Figure W3.** Assessment of the antibody response against tumor cells expressing a surrogate antigen. GL26 cells expressing chicken ovalbumin (GL26-OVA) were implanted in the striatum of C57BL/6 mice and treated 14 days later with an intratumoral injection of Ad-TK+Ad-Flt3L, saline, or an empty vector (Ad.0). Seven days after the treatment, serum was collected to evaluate the presence of circulating anti-GL26-OVA cell IgM and IgG. Histograms and graphs show the fluorescence intensity of fixed GL26-OVA cells that were incubated with normal C57BL/6 serum (red area) or serum from treated tumor-bearing mice (colored lines), followed by FITC-conjugated antimouse IgM or IgG.

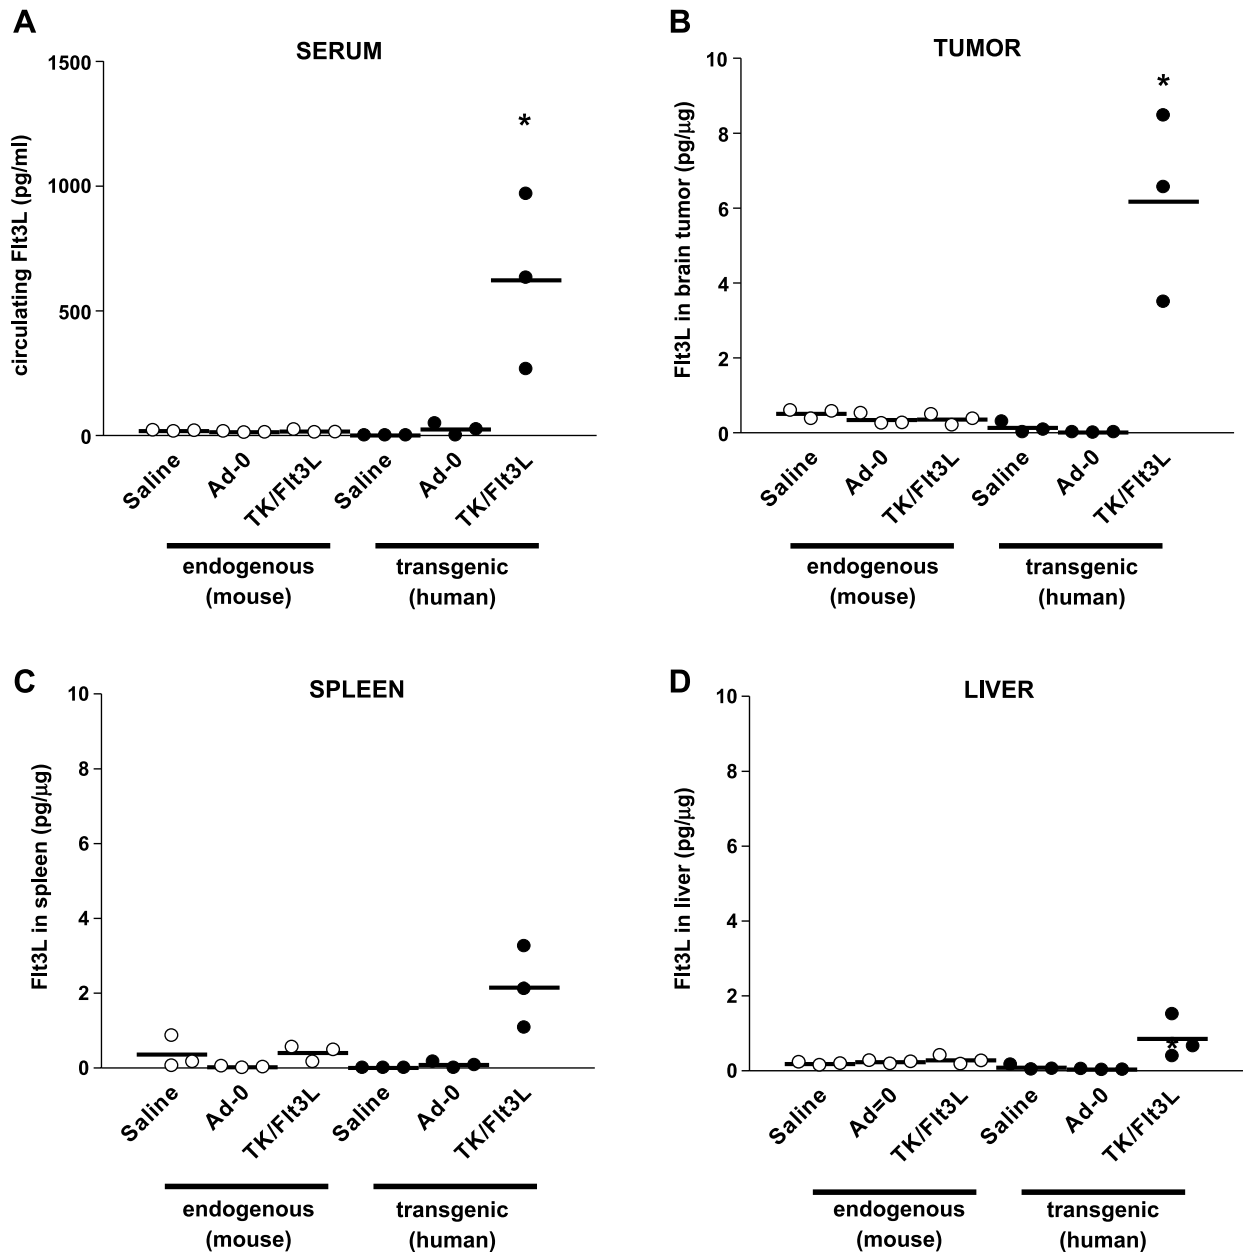

**Figure W4.** FIt3L expression 7 days after intratumoral delivery of Ad-FIt3L and Ad-TK. (A) GL26 tumor cells were implanted into the striatum of C57BL/6 mice; tumors were treated 14 days later with saline (S), Ad.0, or Ad-TK+Ad-FIt3L (TF). Levels of FIt3L expressed from the Ad vector were assessed using an ELISA specific for human FIt3L (transgenic). Levels of endogenous FIt3L were assessed using an ELISA specific for mouse FIt3L. Serum (A), brain tumors (B), spleen (C), and liver (D) were harvested 7 days after treatment, and both endogenous and transgenic FIt3L levels were assayed by ELISA. \* $P < .05$  versus corresponding saline. Two-way ANOVA followed by the Tukey test.
